# Supplementary material for: Three isoreticular MOFs derived from nitrogen-functionalized diisophthalate ligands: exploring the positional effect of nitrogen functional sites on the structural stabilities and selective C2H2/CH4 and CO2/CH4 adsorption properties
Source: Royal Society of Chemistry journal article supplement (doi:10.1039/c8qi00268a), 2018-01-01
Supplement: c8qi00268a1.pdf [file c8qi00268a1.pdf]

**Three isorecticular MOFs derived from nitrogen-functionalized diisophthalate ligands: exploring the positional effect of nitrogen functional sites on the structural stabilities and selective C<sub>2</sub>H<sub>2</sub>/CH<sub>4</sub> and CO<sub>2</sub>/CH<sub>4</sub> adsorption properties**

Dongjie Bai, Xiaoxia Gao, Minghui He, Yao Wang and Yabing He\*

Key Laboratory of the Ministry of Education for Advanced Catalysis Materials,  
College of Chemistry and Life Sciences, Zhejiang Normal University, Jinhua 321004,  
China. E-mail: heyabing@zjnu.cn

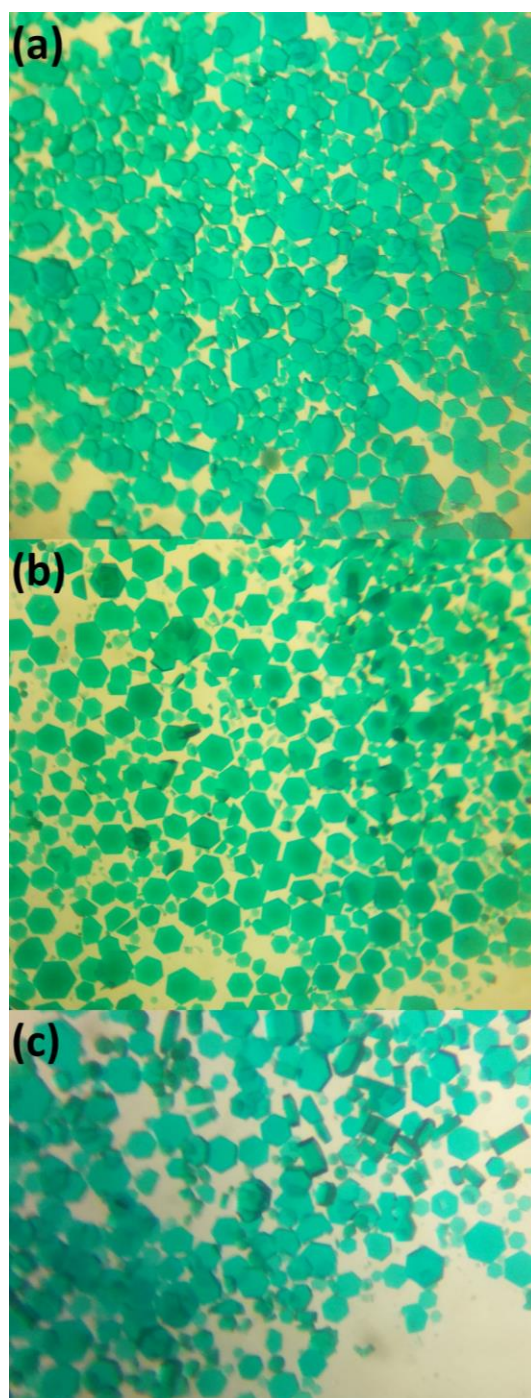

**Fig. S1** The electronic photographs for the as-synthesized (a) **ZJNU-84**, (b) **ZJNU-85**, and (c) **ZJNU-86**.

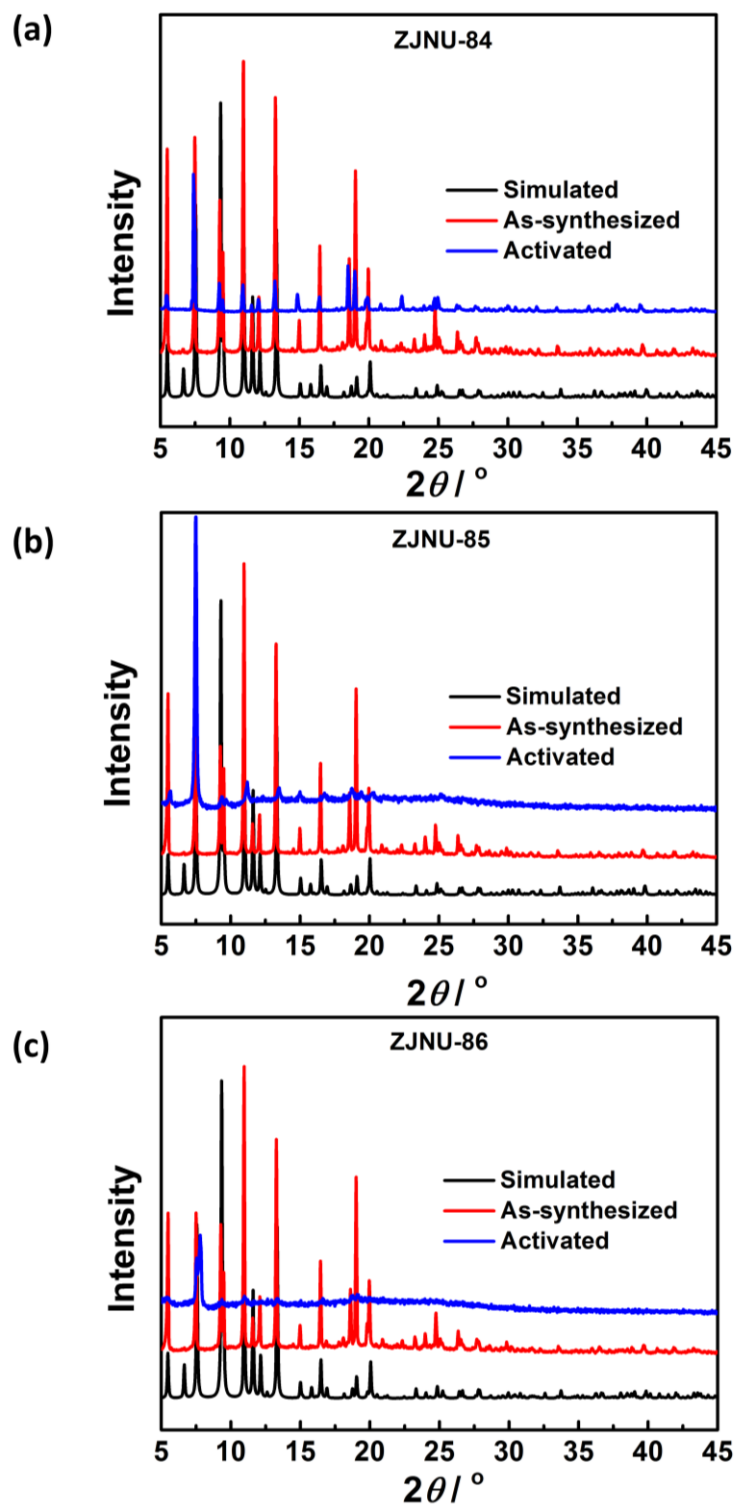

**Fig. S2** Comparison of the experimental and simulated PXRD patterns for (a) ZJNU-84, (b) ZJNU-85, and (c) ZJNU-86.

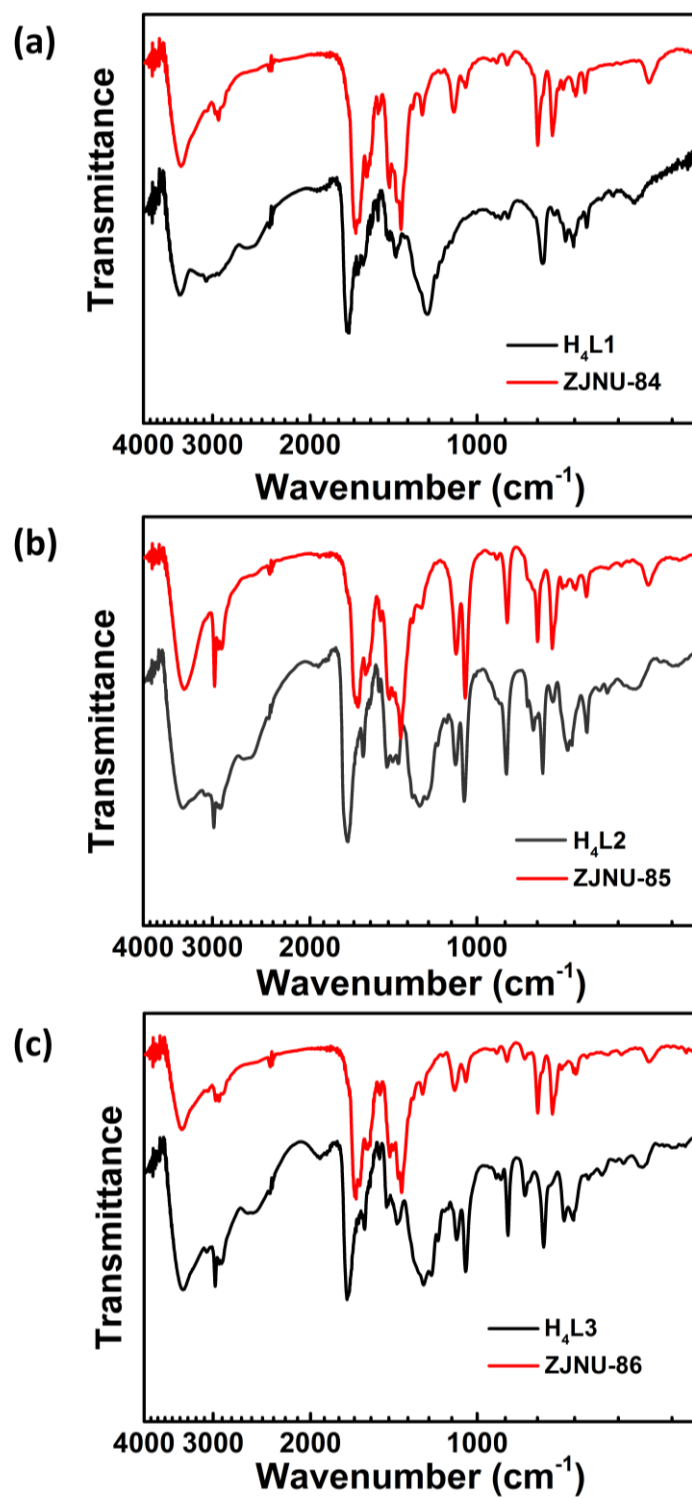

**Fig. S3** Comparison of FTIR spectra of the organic ligands and the corresponding MOFs.

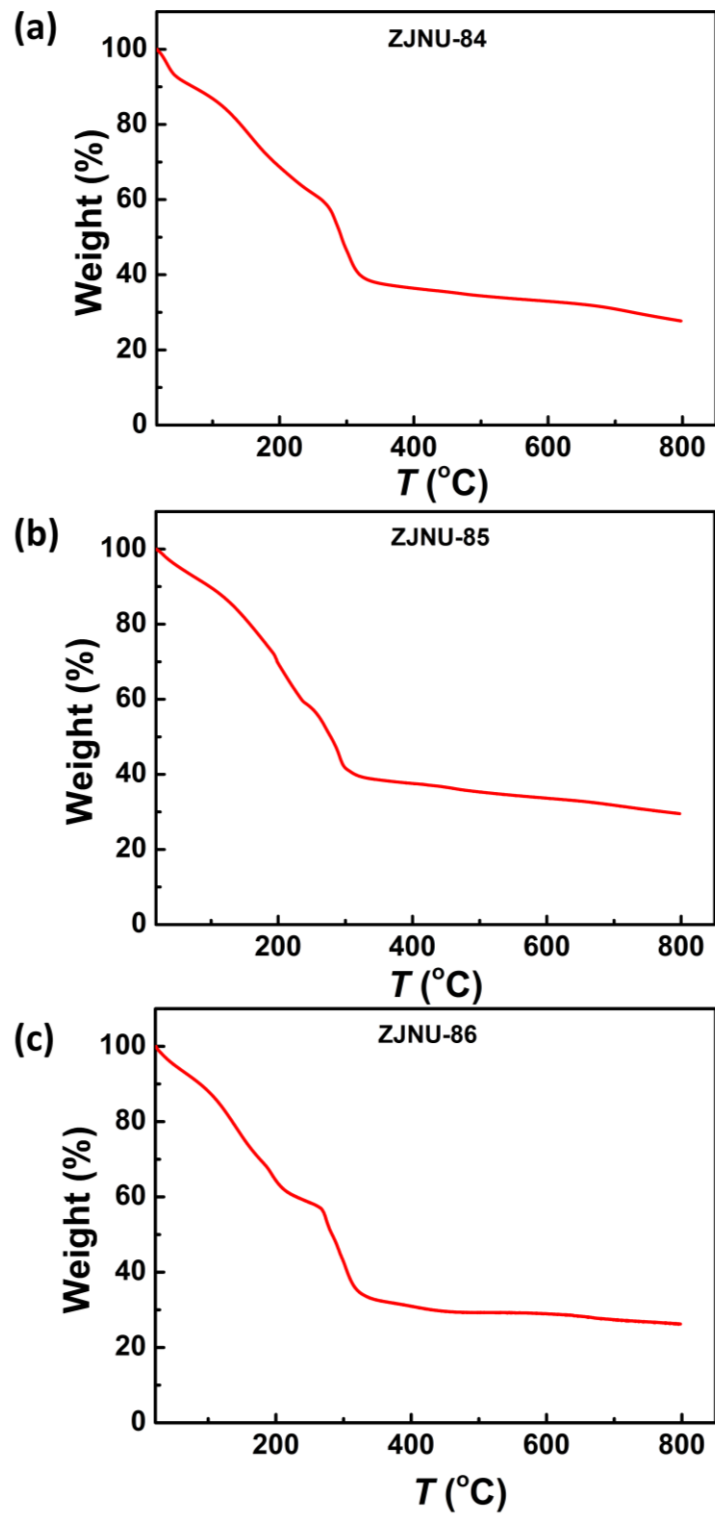

**Fig. S4** TGA curves for the as-synthesized (a) **ZJNU-84**, (b) **ZJNU-85**, and (c) **ZJNU-86** under nitrogen atmosphere.

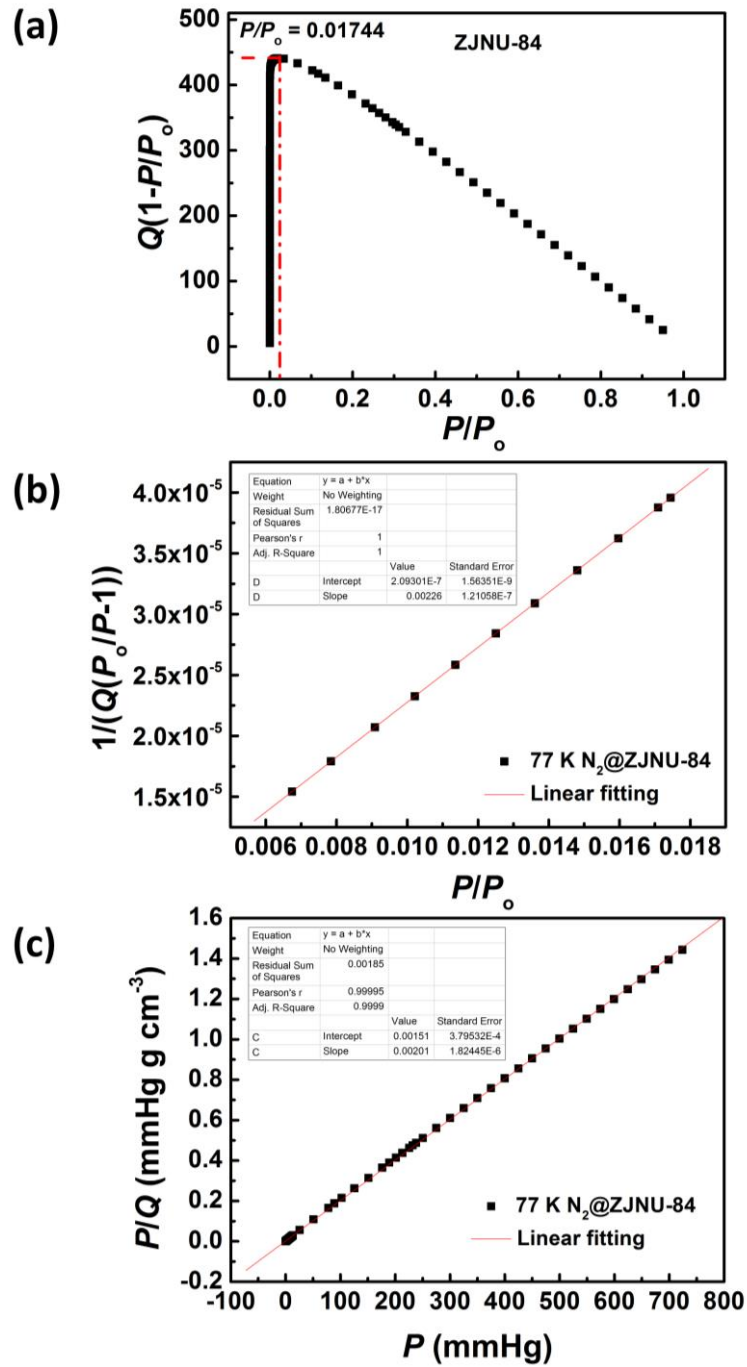

$$S_{\text{BET}} = 1/(2.09301 \times 10^{-7} + 0.00226)/22414 \times 6.023 \times 10^{23} \times 0.162 \times 10^{-18} = 1926 \text{ m}^2 \text{ g}^{-1}$$

$$S_{\text{Langmuir}} = (1/0.00201)/22414 \times 6.023 \times 10^{23} \times 0.162 \times 10^{-18} = 2166 \text{ m}^2 \text{ g}^{-1}$$

$$\text{BET constant } C = 1 + 0.00226/2.09301 \times 10^{-7} = 10799$$

$$(P/P_0)_{n_m} = \frac{1}{\sqrt{C} + 1} = 0.0095313$$

**Fig. S5** (a) The consistency, (b) BET, and (c) Langmuir plots for **ZJNU-84**.

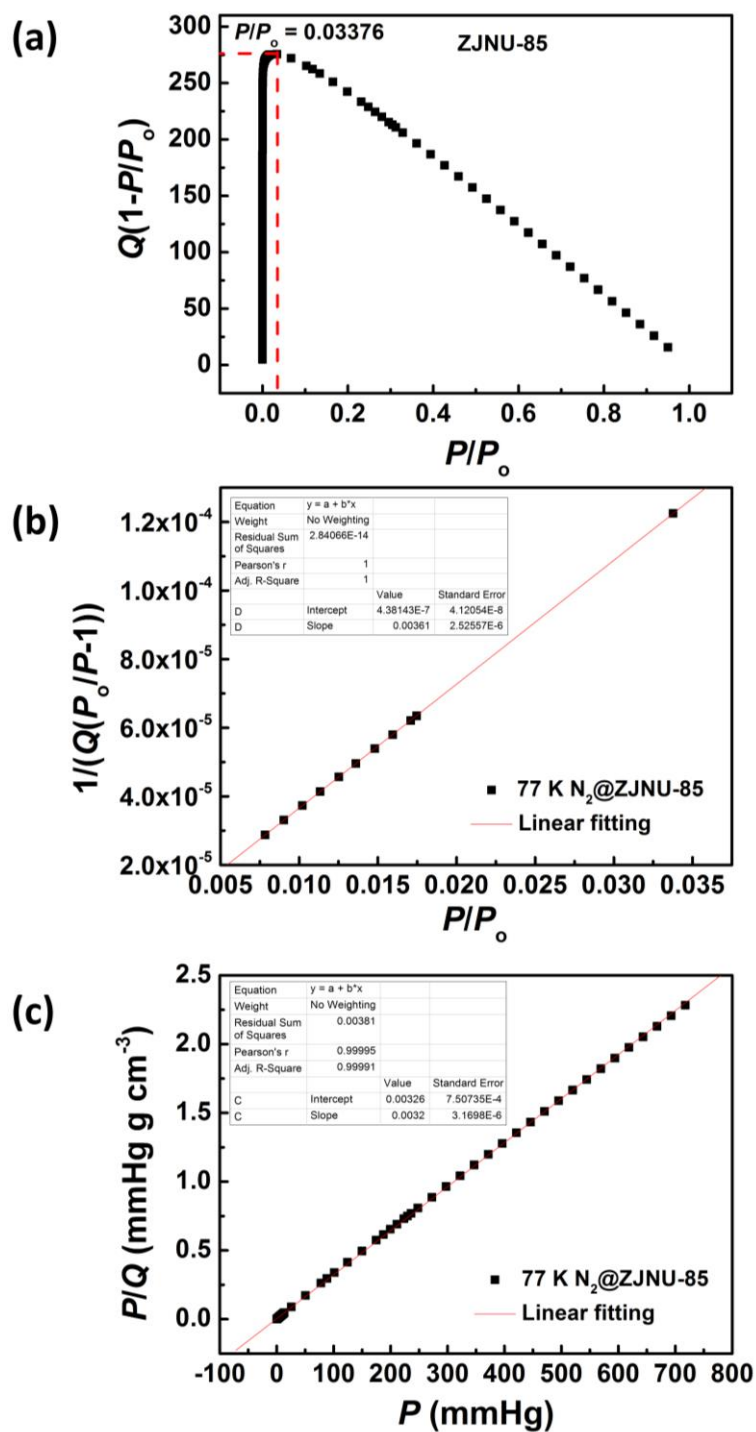

$$S_{BET} = 1/(4.38143 \times 10^{-7} + 0.00361)/22414 \times 6.023 \times 10^{23} \times 0.162 \times 10^{-18} = 1206 \text{ m}^2 \text{ g}^{-1}$$

$$S_{Langmuir} = (1/0.0032)/22414 \times 6.023 \times 10^{23} \times 0.162 \times 10^{-18} = 1360 \text{ m}^2 \text{ g}^{-1}$$

$$\text{BET constant } C = 1 + 0.00361/4.38143 \times 10^{-7} = 8240$$

$$(P/P_o)_{n_m} = \frac{1}{\sqrt{C} + 1} = 0.010896$$

**Fig. S6** (a) The consistency, (b) BET, and (c) Langmuir plots for **ZJNU-85**.

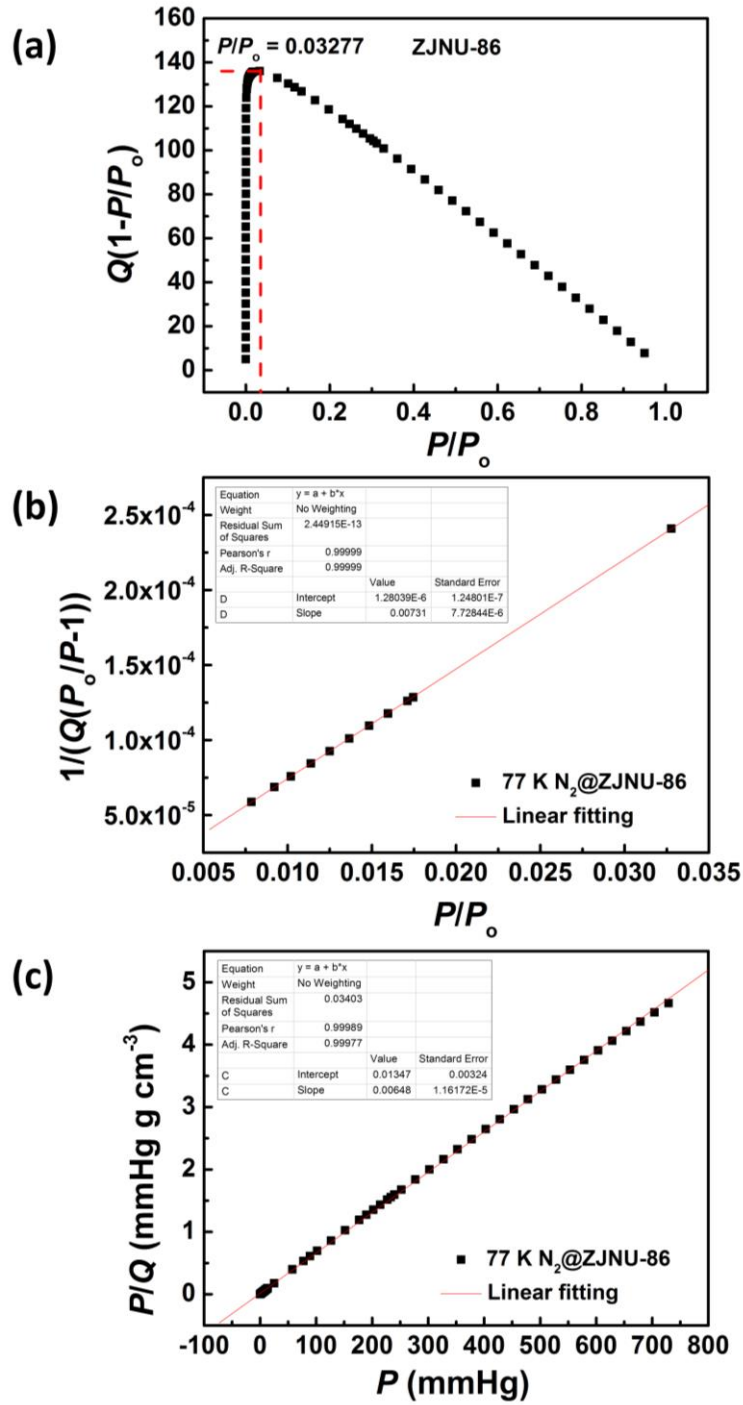

$$S_{\text{BET}} = 1 / (1.28039 \times 10^{-6} + 0.00731) / 22414 \times 6.023 \times 10^{23} \times 0.162 \times 10^{-18} = 595 \text{ m}^2 \text{ g}^{-1}$$

$$S_{\text{Langmuir}} = (1 / 0.00648) / 22414 \times 6.023 \times 10^{23} \times 0.162 \times 10^{-18} = 672 \text{ m}^2 \text{ g}^{-1}$$

$$\text{BET constant } C = 1 + 0.00731 / 1.28039 \times 10^{-6} = 5710$$

$$(P / P_o)_{n_m} = \frac{1}{\sqrt{C} + 1} = 0.01306$$

**Fig. S7** (a) The consistency, (b) BET, and (c) Langmuir plots for **ZJNU-86**.



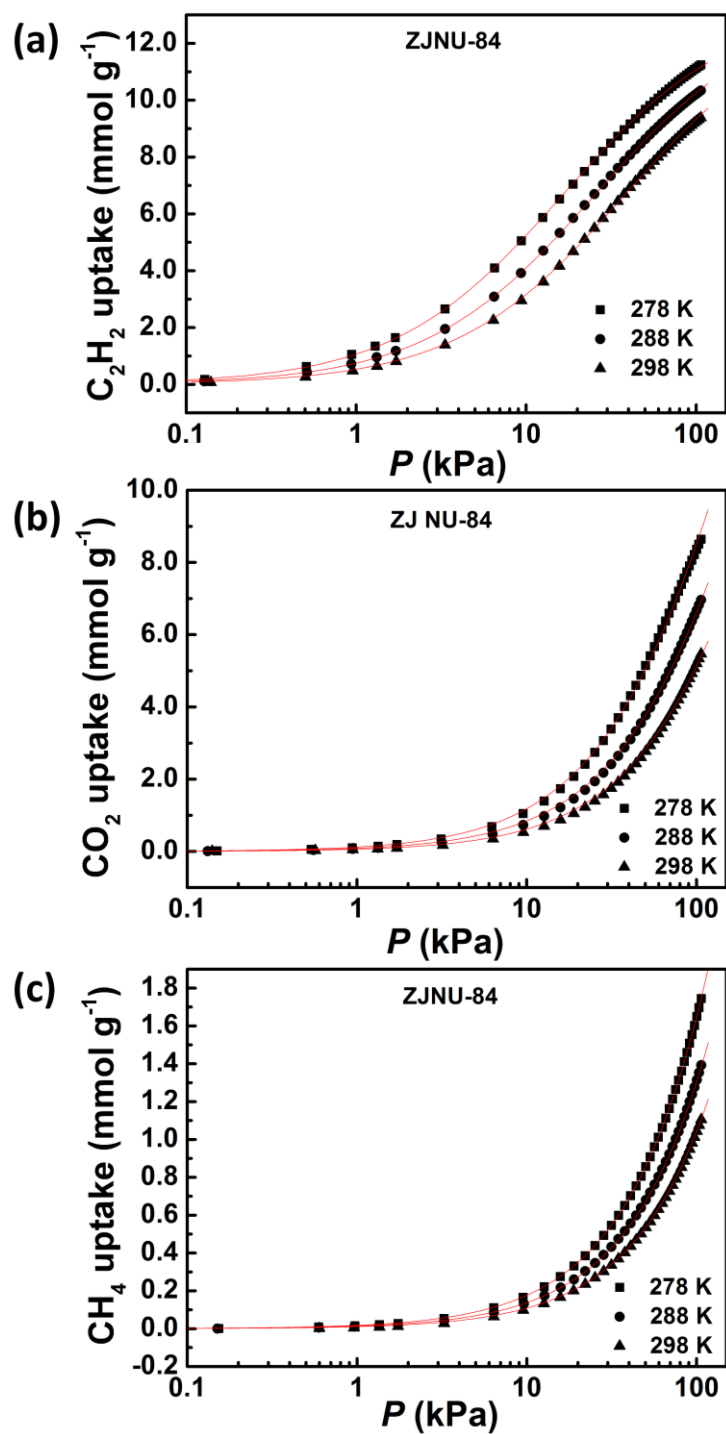

**Fig. S8** Comparison of the pure-component isotherm data for  $\text{C}_2\text{H}_2$ ,  $\text{CO}_2$ , and  $\text{CH}_4$  in **ZJNU-84** with the fitted isotherms at (a) 278 K, (b) 288 K, and (c) 298 K.

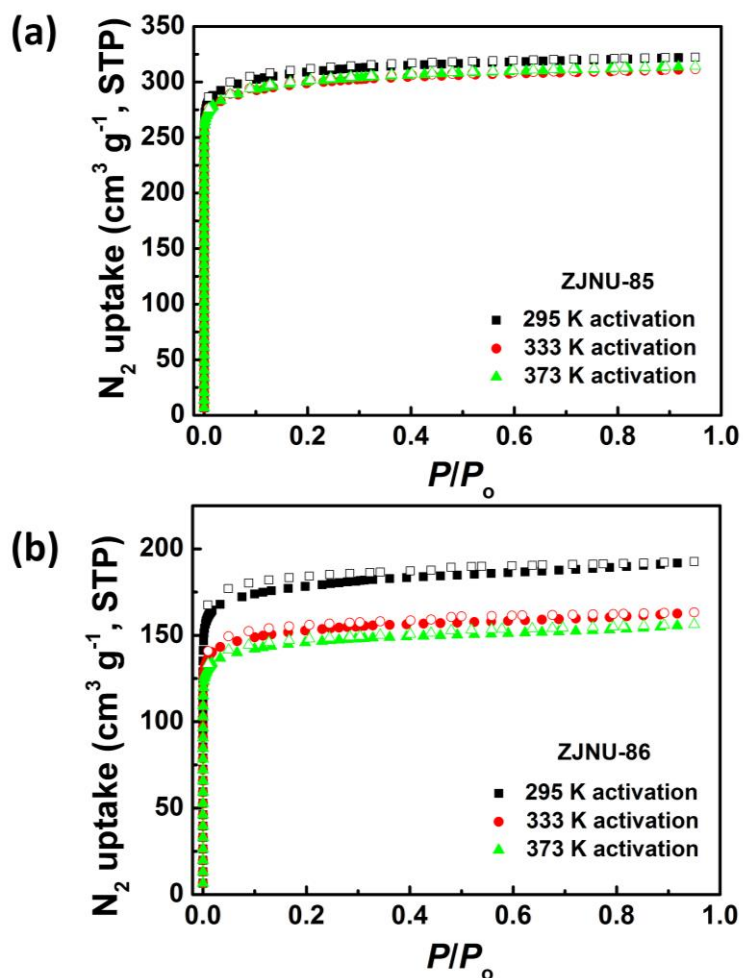

**Fig. S9** Comparison of N<sub>2</sub> adsorption-desorption isotherms of (a) **ZJNU-85** and (b) **ZJNU-86** activated at different temperatures. The as-synthesized samples were guest-exchanged with dry acetone and dichloromethane, and then the exchanged samples were evacuated under dynamic vacuum at different temperatures until the degassed rate reaches 2  $\mu\text{mHg min}^{-1}$ .

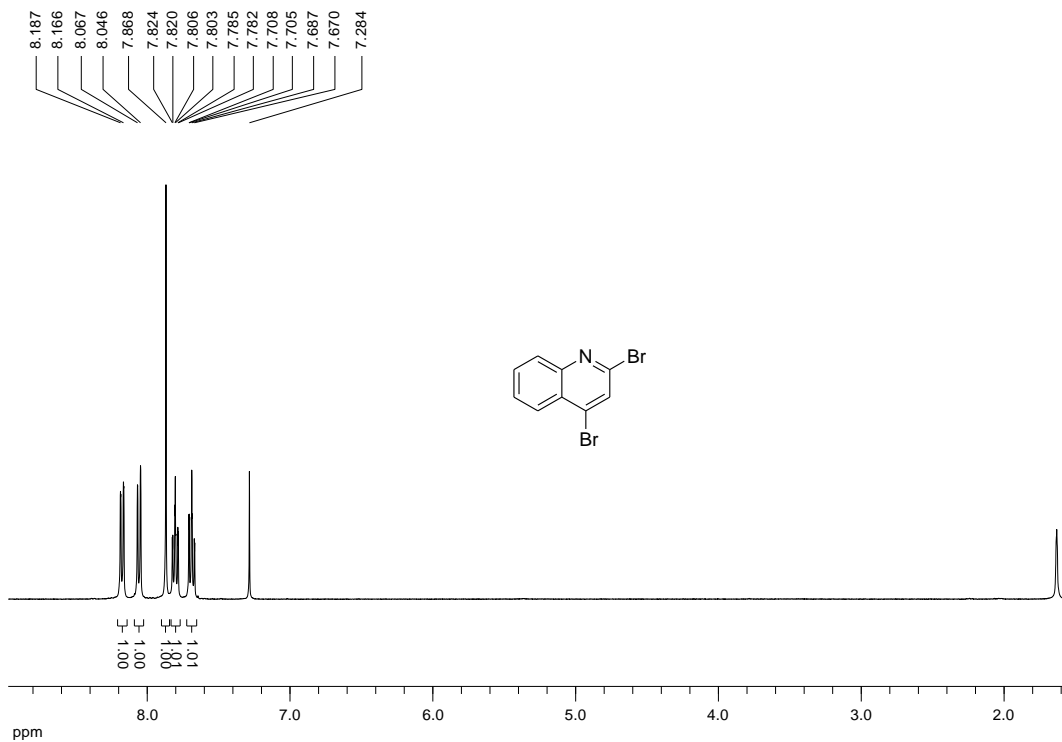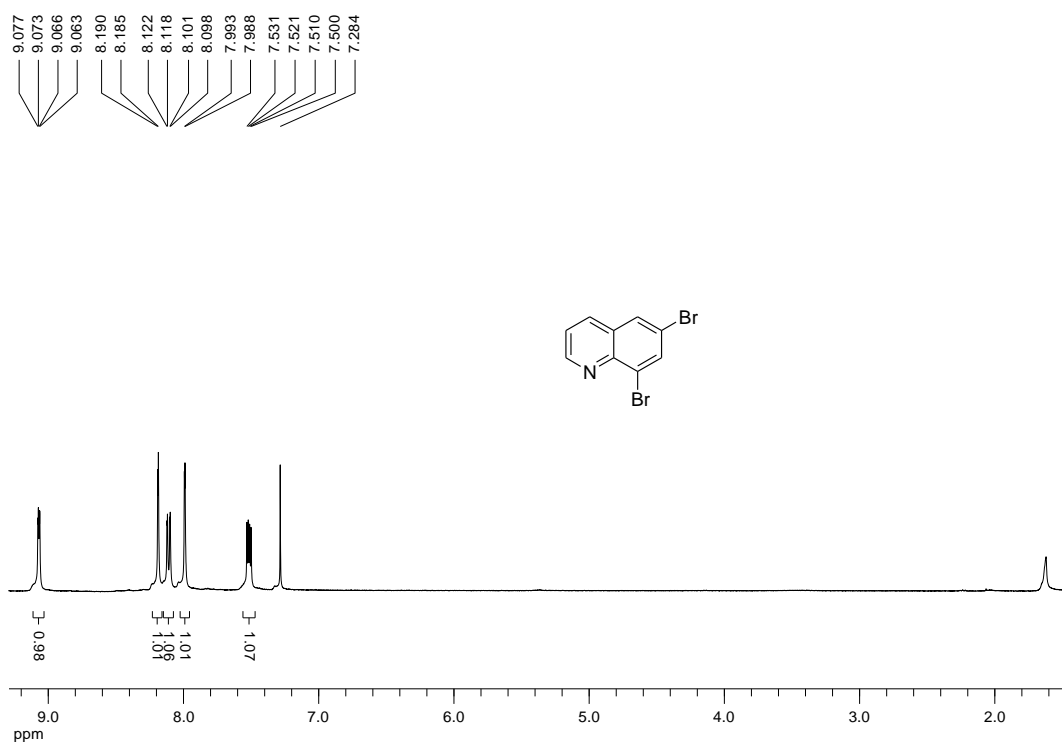

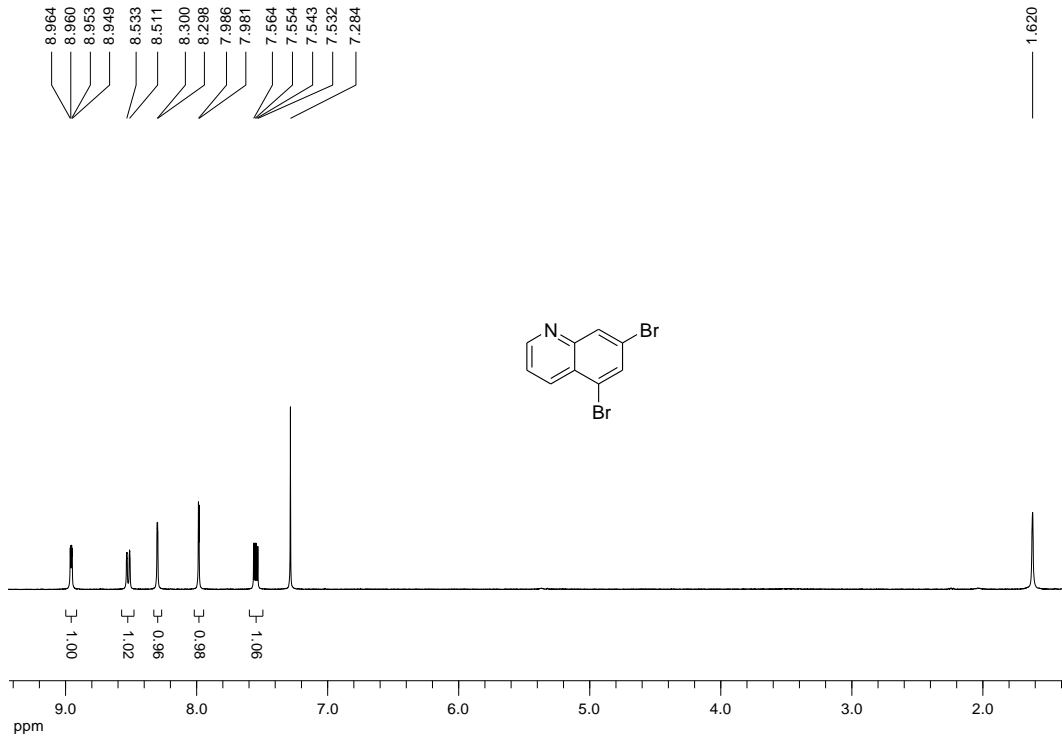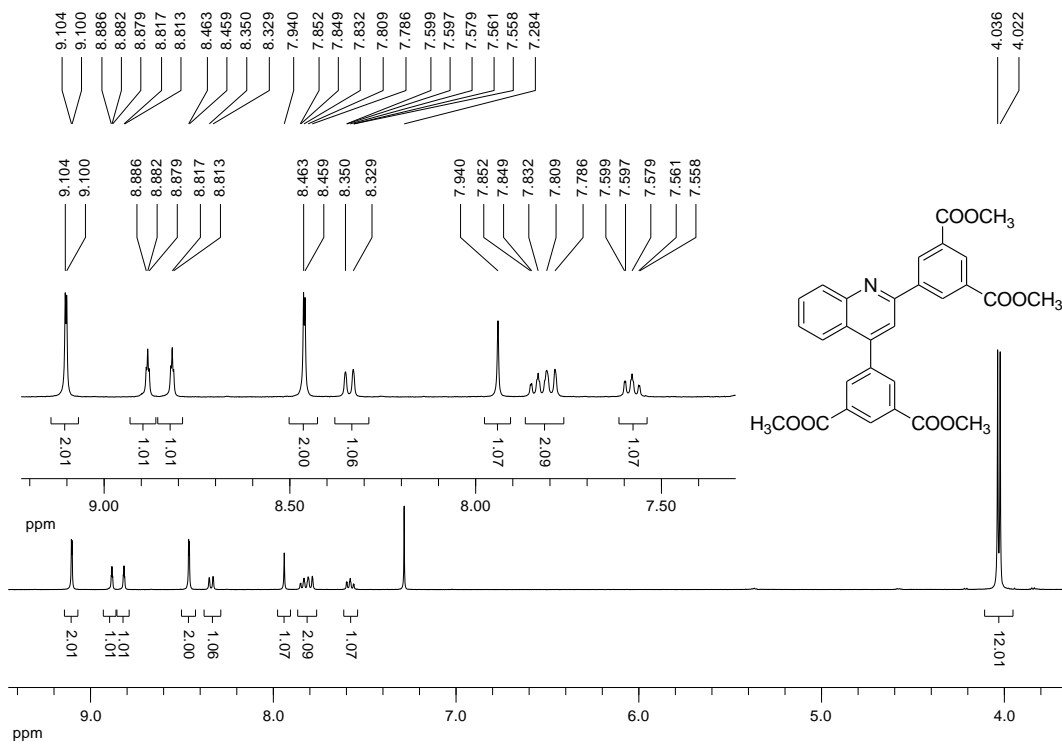

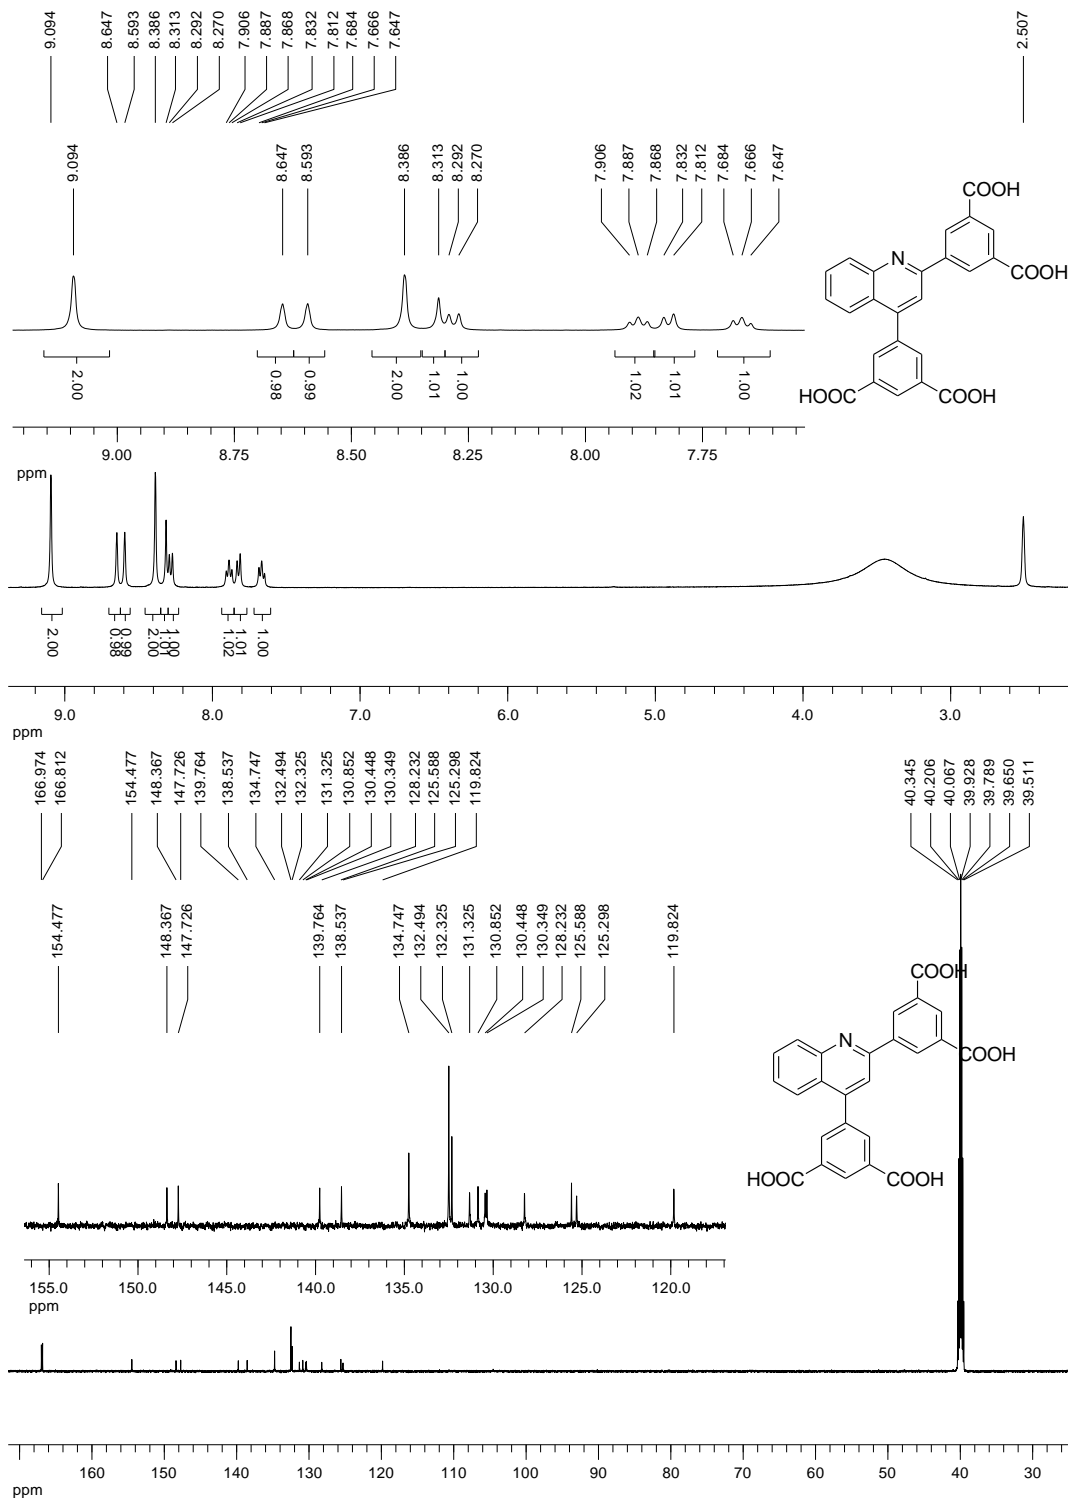

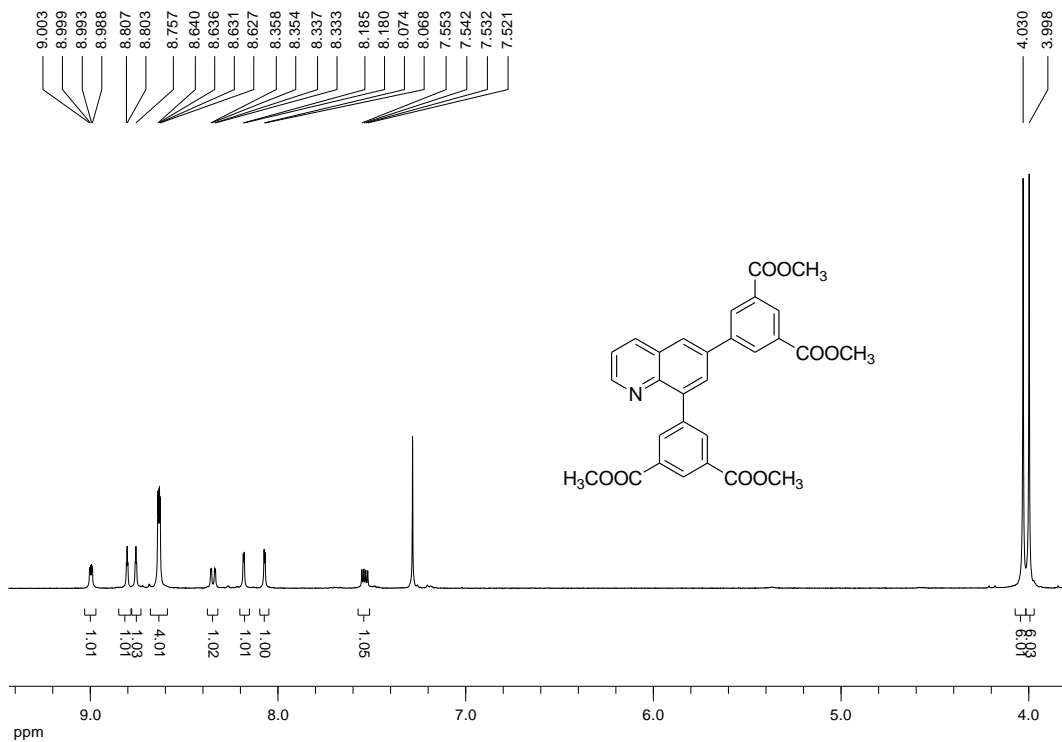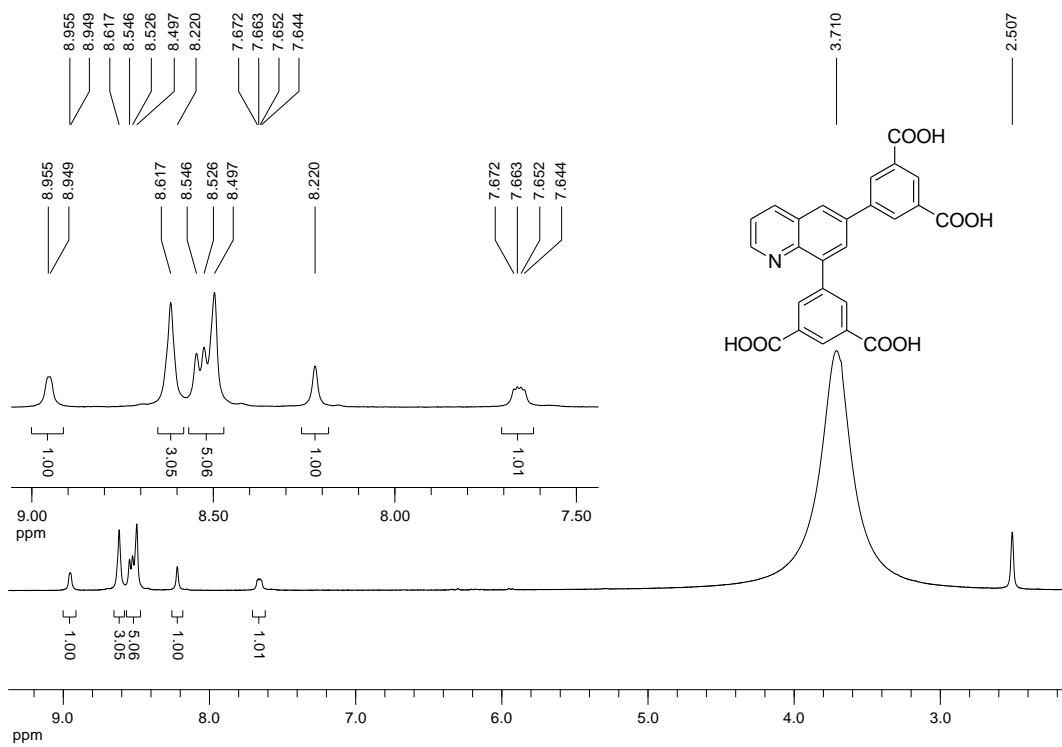

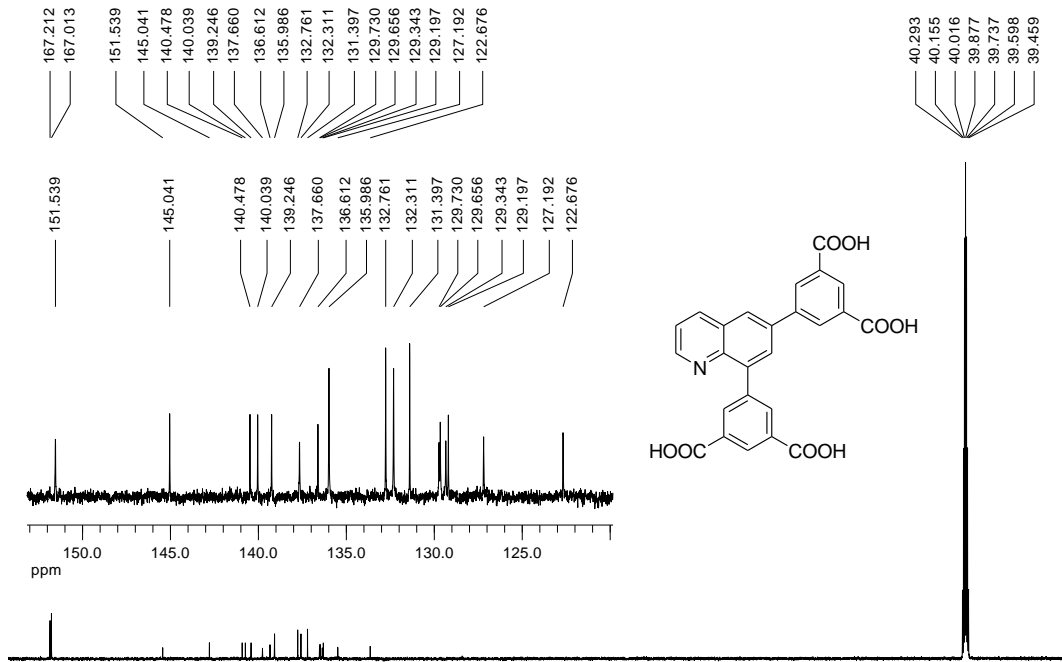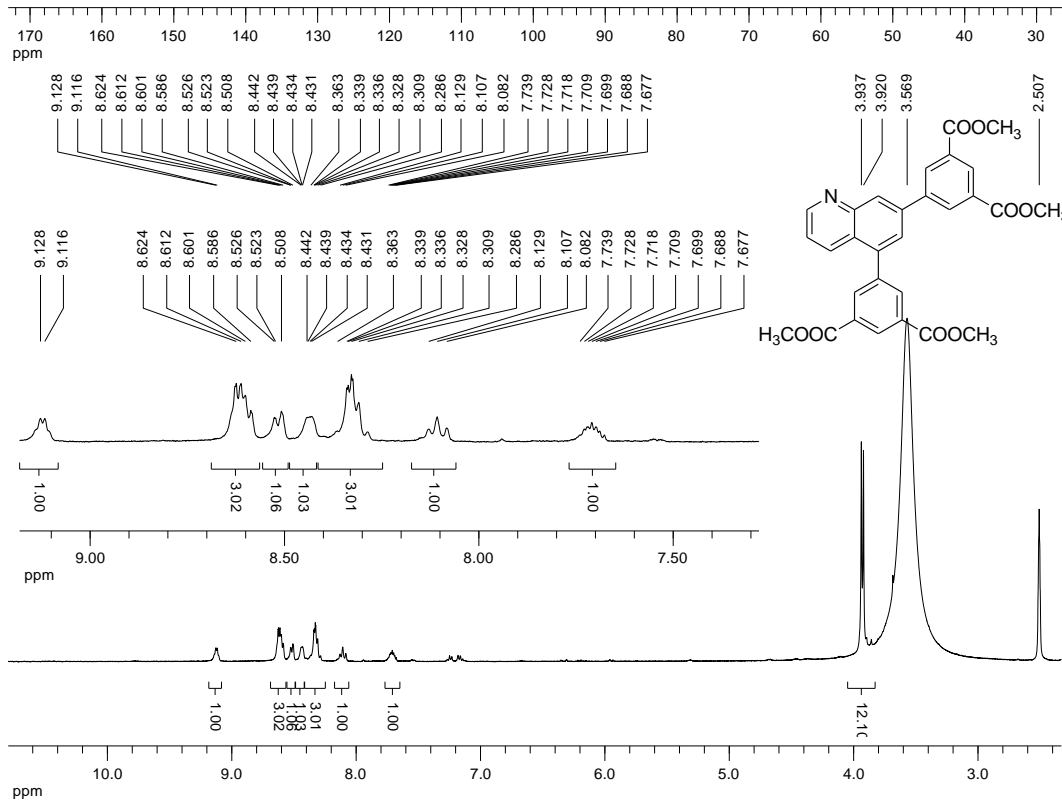

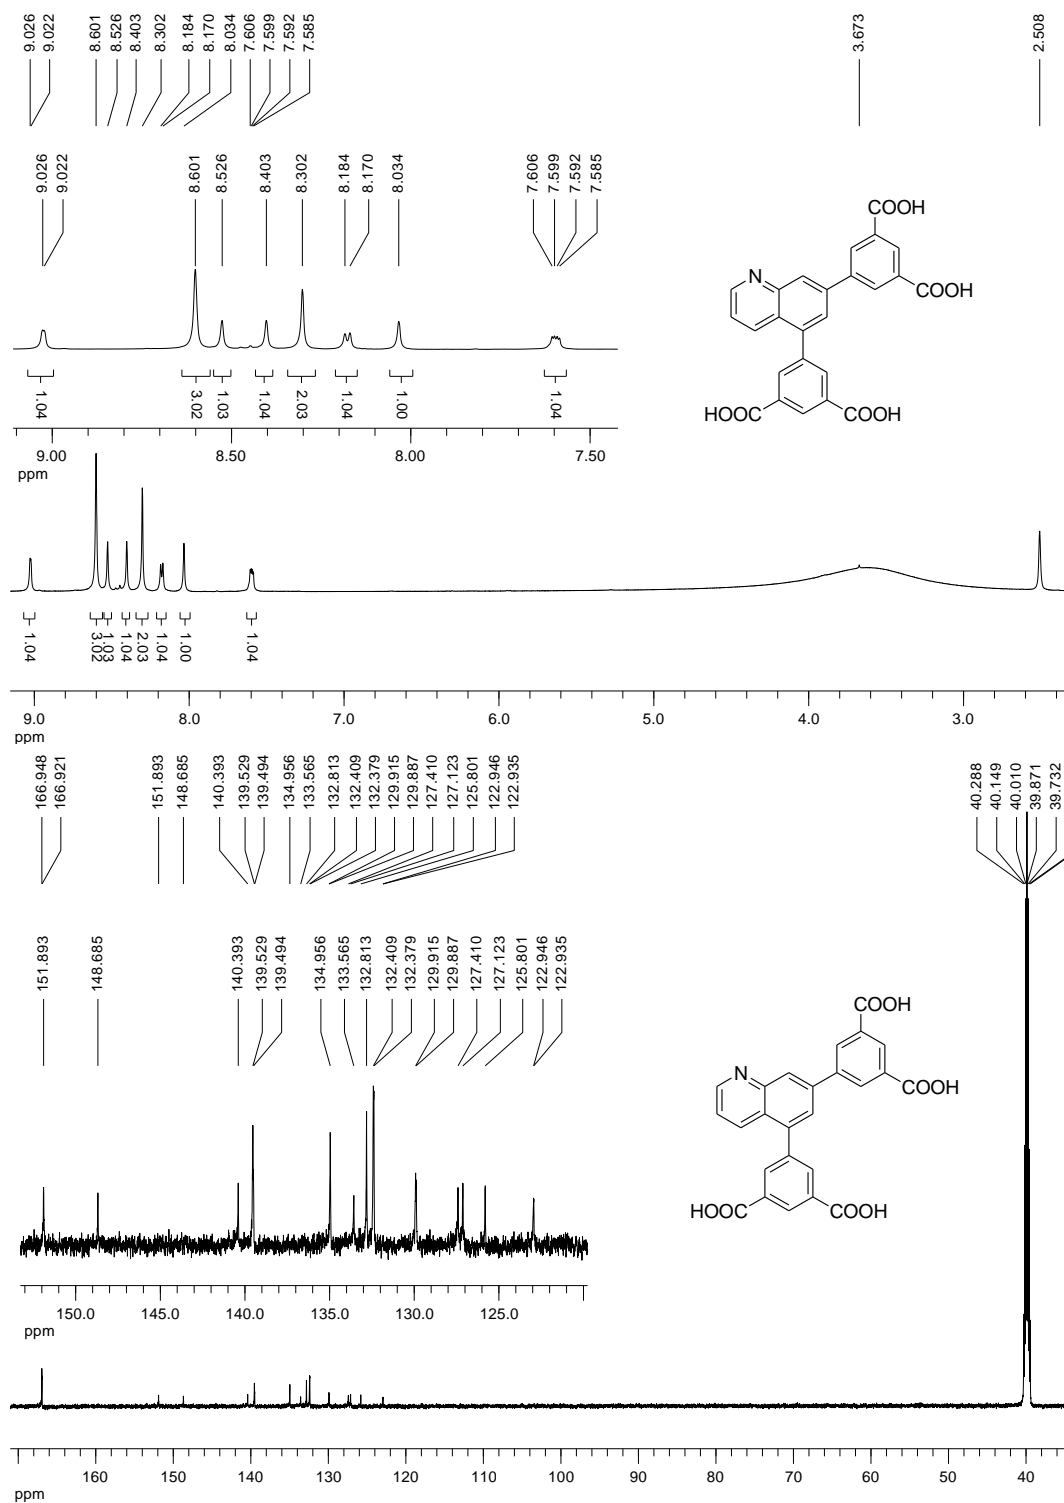

**Fig. S9**  $^1\text{H}$  and  $^{13}\text{C}$  NMR spectra



**Table S1** Langmuir-Freundlich parameters for adsorption of C<sub>2</sub>H<sub>2</sub>, CO<sub>2</sub>, and CH<sub>4</sub> in ZJNU-84.

|                               | $q_{\text{sat}}$<br>(mmol g <sup>-1</sup> ) | $b_0$<br>(kPa) <sup>-<math>\nu</math></sup> | $E$<br>(kJ mol <sup>-1</sup> ) | $\nu$   |
|-------------------------------|---------------------------------------------|---------------------------------------------|--------------------------------|---------|
| C <sub>2</sub> H <sub>2</sub> | 13.36127                                    | 1.54261E-6                                  | 25.28                          | 0.87281 |
| CO <sub>2</sub>               | 27.28497                                    | 2.05477E-7                                  | 23.11                          | 1       |
| CH <sub>4</sub>               | 22.05427                                    | 5.72733E-7                                  | 16.76                          | 1       |

**Table S2** Crystal data and structure refinement for **ZJNU-84**, **ZJNU-85**, and **ZJNU-86**.

| MOFs                                                          | ZJNU-84                                                                                                                             | ZJNU-85                                                                                                                                 | ZJNU-86                                                                                                                                 |
|---------------------------------------------------------------|-------------------------------------------------------------------------------------------------------------------------------------|-----------------------------------------------------------------------------------------------------------------------------------------|-----------------------------------------------------------------------------------------------------------------------------------------|
| Empirical formula                                             | C <sub>25</sub> H <sub>15</sub> Cu <sub>2</sub> NO <sub>10</sub>                                                                    | C <sub>25</sub> H <sub>15</sub> Cu <sub>2</sub> NO <sub>10</sub>                                                                        | C <sub>25</sub> H <sub>15</sub> Cu <sub>2</sub> NO <sub>10</sub>                                                                        |
| Formula weight                                                | 616.46                                                                                                                              | 616.46                                                                                                                                  | 616.46                                                                                                                                  |
| $\lambda$ (Å)                                                 | 0.71073                                                                                                                             | 1.54184                                                                                                                                 | 1.54184                                                                                                                                 |
| Crystal system                                                | Hexagonal                                                                                                                           | Hexagonal                                                                                                                               | Hexagonal                                                                                                                               |
| Space group                                                   | <i>P</i> 6 <sub>3</sub> / <i>mmc</i>                                                                                                | <i>P</i> 6 <sub>3</sub> / <i>mmc</i>                                                                                                    | <i>P</i> 6 <sub>3</sub> / <i>mmc</i>                                                                                                    |
| Unit cell dimensions                                          | $a = 18.5415(2)$ Å<br>$b = 18.5415(2)$ Å<br>$c = 23.4290(5)$ Å<br>$\alpha = 90^\circ$<br>$\beta = 90^\circ$<br>$\gamma = 120^\circ$ | $a = 18.56613(16)$ Å<br>$b = 18.56613(16)$ Å<br>$c = 23.5771(3)$ Å<br>$\alpha = 90^\circ$<br>$\beta = 90^\circ$<br>$\gamma = 120^\circ$ | $a = 18.62148(17)$ Å<br>$b = 18.62148(17)$ Å<br>$c = 23.3558(3)$ Å<br>$\alpha = 90^\circ$<br>$\beta = 90^\circ$<br>$\gamma = 120^\circ$ |
| $V$ (Å <sup>3</sup> )                                         | 6975.48(18)                                                                                                                         | 7038.24(13)                                                                                                                             | 7013.81(12)                                                                                                                             |
| $Z$                                                           | 6                                                                                                                                   | 6                                                                                                                                       | 6                                                                                                                                       |
| $D_c$ (g cm <sup>-3</sup> )                                   | 0.881                                                                                                                               | 0.873                                                                                                                                   | 0.876                                                                                                                                   |
| $\mu$ (mm <sup>-1</sup> )                                     | 0.946                                                                                                                               | 1.399                                                                                                                                   | 1.404                                                                                                                                   |
| $F(000)$                                                      | 1860                                                                                                                                | 1860                                                                                                                                    | 1860                                                                                                                                    |
| Crystal size (mm)                                             | 0.26 × 0.21 × 0.12                                                                                                                  | 0.23 × 0.20 × 0.11                                                                                                                      | 0.12 × 0.11 × 0.09                                                                                                                      |
| $\theta$ range for data collection (°)                        | 1.74 to 26.35                                                                                                                       | 2.75 to 74.18                                                                                                                           | 2.74 to 74.17                                                                                                                           |
| Limiting indices                                              | $-11 \leq h \leq 22$<br>$-23 \leq k \leq 12$<br>$-28 \leq l \leq 29$                                                                | $-23 \leq h \leq 21$<br>$-12 \leq k \leq 16$<br>$-29 \leq l \leq 28$                                                                    | $-10 \leq h \leq 22$<br>$-23 \leq k \leq 14$<br>$-26 \leq l \leq 28$                                                                    |
| Reflections collected / unique                                | 23769 / 2656                                                                                                                        | 27117 / 2679                                                                                                                            | 25602 / 2674                                                                                                                            |
| $R_{int}$                                                     | 0.0368                                                                                                                              | 0.0625                                                                                                                                  | 0.0536                                                                                                                                  |
| Max. and min. transmission                                    | 0.8949 and 0.7910                                                                                                                   | 99.6 %                                                                                                                                  | 99.5 %                                                                                                                                  |
| Refinement method                                             | Full-matrix least-squares on $F^2$                                                                                                  | Full-matrix least-squares on $F^2$                                                                                                      | Full-matrix least-squares on $F^2$                                                                                                      |
| Data/restraints/parameters                                    | 2656 / 0 / 120                                                                                                                      | 2679 / 0 / 118                                                                                                                          | 2674 / 0 / 117                                                                                                                          |
| Goodness-of-fit on $F^2$                                      | 1.096                                                                                                                               | 1.039                                                                                                                                   | 0.998                                                                                                                                   |
| Final $R$ indices [ $I > 2\sigma(I)$ ]                        | $R_1 = 0.0662$<br>$wR_2 = 0.2468$                                                                                                   | $R_1 = 0.0570$<br>$wR_2 = 0.2222$                                                                                                       | $R_1 = 0.0491$<br>$wR_2 = 0.1860$                                                                                                       |
| $R$ indices (all data)                                        | $R_1 = 0.0706$<br>$wR_2 = 0.2556$                                                                                                   | $R_1 = 0.0629$<br>$wR_2 = 0.2371$                                                                                                       | $R_1 = 0.0558$<br>$wR_2 = 0.1952$                                                                                                       |
| Largest diff. peak and hole (e <sup>-</sup> Å <sup>-3</sup> ) | 0.721 and -0.622                                                                                                                    | 0.540 and -0.475                                                                                                                        | 0.337 and -0.288                                                                                                                        |
| CCDC                                                          | 1832344                                                                                                                             | 1832342                                                                                                                                 | 1832343                                                                                                                                 |
